# Supplementary material for: Endoplasmic Reticulum Stress and Autophagy Markers in Soleus Muscle Disuse-Induced Atrophy of Rats Treated with Fish Oil
Source: MDPI journal article supplement (doi:10.3390/nu13072298), 2021-07-03
Supplement: s1 [file s1]

**Supplemental Table S1.** Composition of fatty acids in g/100 g gastrocnemius muscle wet weight.

| Fatty acid   | Name                            | MO-C           | MO-HS         | EPA-C         | EPA-HS        | DHA-C         | DHA-HS        |
|--------------|---------------------------------|----------------|---------------|---------------|---------------|---------------|---------------|
| 14 : 0       | Myristic                        | —              | —             | —             | —             | —             | —             |
| 16 : 0       | Palmitic                        | 0.241 ± 0.067  | 0.182 ± 0.041 | 0.187 ± 0.040 | 0.160 ± 0.008 | 0.179 ± 0.020 | 0.176 ± 0.028 |
| 16 : 1 (n-7) | Hexadecenoic                    | —              | 0.009 ± 0.006 | 0.007 ± 0.006 | —             | 0.006 ± 0.005 | 0.008 ± 0.007 |
| 17 : 0       | Margaric                        | —              | —             | 0.004 ± 0.004 | —             | —             | —             |
| 17 : 1 (n-7) | Heptadecenoic                   | —              | —             | —             | —             | —             | —             |
| 18 : 0       | Stearic <sup>#</sup>            | 0.158 ± 0.028  | 0.112 ± 0.008 | 0.114 ± 0.018 | 0.112 ± 0.011 | 0.105 ± 0.019 | 0.102 ± 0.009 |
| 18 : 1 (n-9) | Oleic                           | 0.153 ± 0.082  | 0.108 ± 0.054 | 0.112 ± 0.027 | 0.080 ± 0.021 | 0.099 ± 0.014 | 0.097 ± 0.016 |
| 18 : 1 (n-7) | Vaccenic <sup>#</sup>           | 0.032 ± 0.007  | 0.024 ± 0.007 | 0.021 ± 0.005 | 0.020 ± 0.002 | 0.022 ± 0.001 | 0.021 ± 0.003 |
| 18 : 2 (n-6) | Linoleic                        | 0.332 ± 0.142  | 0.220 ± 0.086 | 0.208 ± 0.067 | 0.160 ± 0.009 | 0.201 ± 0.039 | 0.183 ± 0.026 |
| 20 : 0       | Eicosanoic                      | —              | —             | —             | —             | —             | —             |
| 20 : 1 (n-9) | Eicosenoic                      | —              | —             | —             | —             | —             | —             |
| 18 : 3 (n-6) | γ -Linolenic                    | —              | —             | —             | —             | 0.001 ± 0.000 | —             |
| 18 : 3 (n-3) | α-Linolenic <sup>*</sup>        | 0.040 ± 0.034  | 0.009 ± 0.005 | 0.006 ± 0.006 | —             | 0.015 ± 0.012 | 0.005 ± 0.004 |
| 22 : 0       | Docosanoic                      | 0.025 ± 0.0024 | —             | —             | —             | —             | —             |
| 20 : 2       | Eicosadienoic                   | —              | —             | —             | 0.002 ± 0.002 | —             | —             |
| 20 : 3 (n-6) | Eicosatrienoic                  | —              | —             | —             | —             | —             | —             |
| 20 : 4 (n-6) | Arachidonic <sup>###</sup>      | 0.165 ± 0.015  | 0.136 ± 0.003 | 0.079 ± 0.009 | 0.081 ± 0.011 | 0.076 ± 0.008 | 0.074 ± 0.007 |
| 20 : 5 (n-3) | Eicosapentaenoic                | —              | —             | —             | 0.022 ± 0.003 | 0.007 ± 0.001 | 0.007 ± 0.002 |
| 24 : 1 (n-9) | Nervonic                        | 0.018 ± 0.013  | 0.002 ± 0.002 | —             | 0.006 ± 0.002 | 0.007 ± 0.007 | 0.003 ± 0.003 |
| 22 : 5 (n-6) | Docosapentaenoic                | 0.014 ± 0.003  | 0.013 ± 0.001 | —             | 0.003 ± 0.003 | 0.006 ± 0.001 | 0.006 ± 0.001 |
| 22 : 5 (n-3) | Docosapentaenoic <sup>###</sup> | 0.021 ± 0.002  | 0.017 ± 0.002 | 0.034 ± 0.006 | 0.031 ± 0.002 | 0.011 ± 0.002 | 0.010 ± 0.002 |
| 22 : 6 (n-3) | Docosahexaenoic <sup>###</sup>  | 0.071 ± 0.010  | 0.064 ± 0.003 | 0.126 ± 0.018 | 0.138 ± 0.027 | 0.173 ± 0.034 | 0.176 ± 0.026 |
| <b>Total</b> | <b>Saturated</b>                | 0.424 ± 0.111  | 0.295 ± 0.046 | 0.305 ± 0.056 | 0.277 ± 0.017 | 0.284 ± 0.034 | 0.279 ± 0.035 |

|                |                        |               |               |                            |                            |                            |                            |
|----------------|------------------------|---------------|---------------|----------------------------|----------------------------|----------------------------|----------------------------|
|                | Monounsaturated        | 0.203 ± 0.099 | 0.143 ± 0.065 | 0.140 ± 0.037              | 0.107 ± 0.025              | 0.133 ± 0.011              | 0.129 ± 0.028              |
|                | Polyunsaturated        | 0.642 ± 0.188 | 0.459 ± 0.097 | 0.483 ± 0.113              | 0.437 ± 0.043              | 0.488 ± 0.081              | 0.461 ± 0.066              |
|                | Omega-6 <sup>##</sup>  | 0.511 ± 0.152 | 0.369 ± 0.088 | 0.287 ± 0.076 <sup>x</sup> | 0.247 ± 0.013              | 0.283 ± 0.044 <sup>x</sup> | 0.263 ± 0.034              |
|                | Omega-3 <sup>###</sup> | 0.132 ± 0.038 | 0.090 ± 0.009 | 0.196 ± 0.037              | 0.191 ± 0.030 <sup>y</sup> | 0.206 ± 0.042 <sup>x</sup> | 0.198 ± 0.033 <sup>y</sup> |
| <b>Fatty %</b> |                        | 1.360 ± 0.419 | 0.963 ± 0.223 | 0.991 ± 0.220              | 0.878 ± 0.047              | 0.969 ± 0.128              | 0.929 ± 0.131              |

The determination of fat was calculated from the tridecanoate triglyceride, which was used as internal standard. Values are presented as mean ± SD, n=3 animals. The results were compared using two-way ANOVA. The results were compared using two-way ANOVA. \*  $P<0.05$ : hindlimb suspension main effect. #  $P<0.05$ ; ##  $P<0.01$ ; ###  $P<0.001$ : fish oil supplementation main effect. **MO-C**: Mineral oil supplemented group; **MO-HS**: Mineral oil supplemented and hindlimb suspension group; **EPA-C**: High eicosapentaenoic acid fish oil supplemented group; **EPA-HS**: High eicosapentaenoic acid fish oil supplemented and hindlimb suspension group; **DHA-C**: High docosahexaenoic acid fish oil supplemented group; **DHA-HS**: High docosahexaenoic acid fish oil supplemented and hindlimb suspension group; — : not detected.

## Supplemental Figure S1

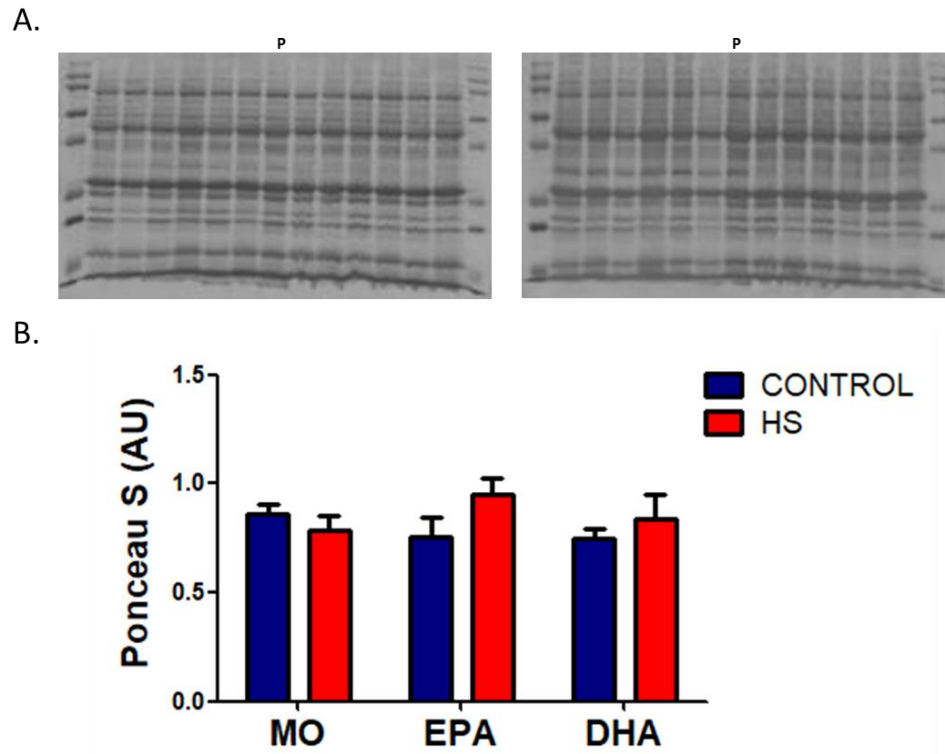

### Supplemental Figure S1. Ponceau S quantification of western blot membranes.

(A) Representative images of the western blot membranes stained with Ponceau S used in this study. (B) Average quantitative analysis of Ponceau S staining. No significant differences were observed. Results were compared using two-way ANOVA (hindlimb suspension effect) and the Bonferroni post-hoc test. The six groups included mineral oil supplemented control (MO-C), MO with hind limb suspension (MO-HS), high EPA fish oil control (EPA-C), EPA with HS (EPA-HS), high DHA fish oil control (DHA-C) and DHA with HS (DHA-HS). P, pool containing a mixture with equal parts of all samples – used to normalize Ponceau S quantitative results; AU, arbitrary units.

## Supplemental Figure S2

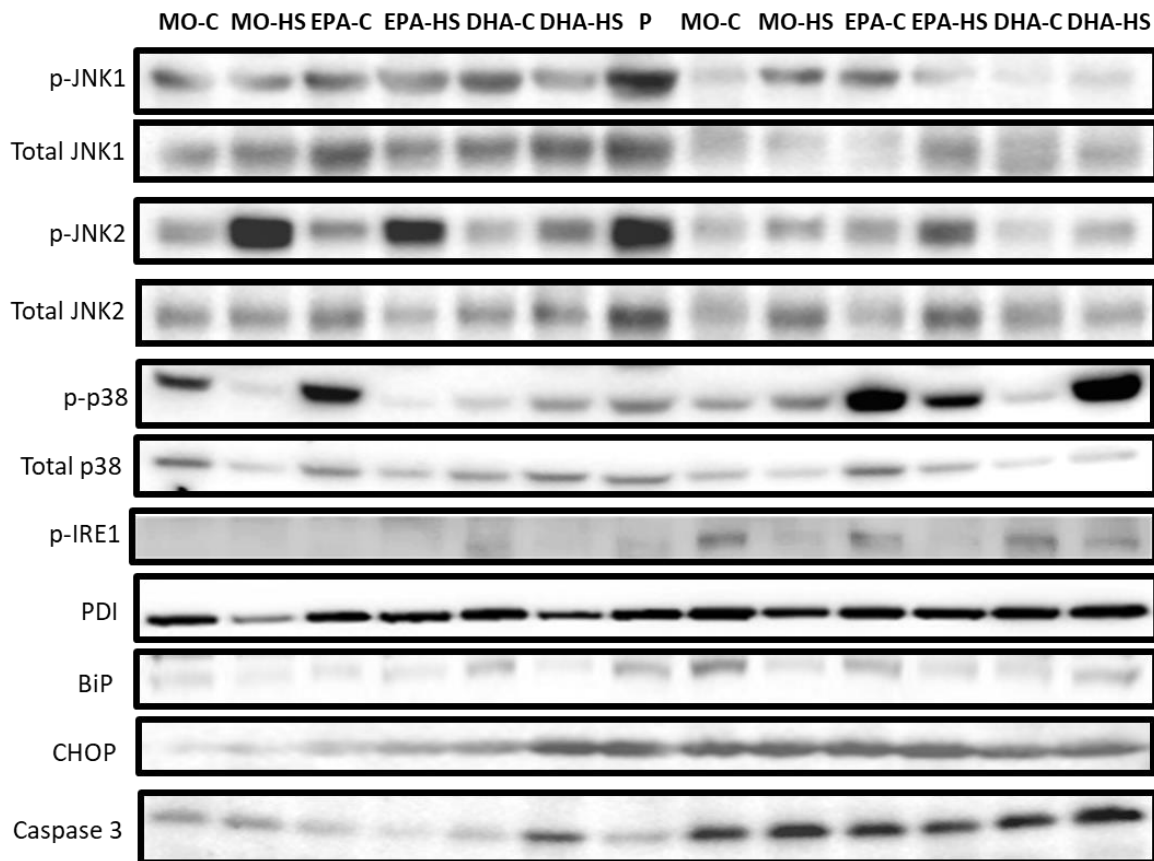

**Supplemental Figure S2.** Images used for quantitative analysis of the western blot assays in this study. **MO-C:** Mineral oil supplemented group; **MO-HS:** Mineral oil supplemented and hindlimb suspension group; **EPA-C:** High eicosapentaenoic acid fish oil supplemented group; **EPA-HS:** High eicosapentaenoic acid fish oil supplemented and hindlimb suspension group; **DHA-C:** High docosahexaenoic acid fish oil supplemented group; **DHA-HS:** High docosahexaenoic acid fish oil supplemented and hindlimb suspension group; **P:** pool containing a mixture of equal parts of all samples – used to normalize Ponceau S quantitative results.

### Supplemental Figure S3

|           | MO-C      |           |           | MO-HS     |           |           | EPA-C     |           |           | EPA-HS    |           |           | DHA-C     |           |           | DHA-HS    |           |           |
|-----------|-----------|-----------|-----------|-----------|-----------|-----------|-----------|-----------|-----------|-----------|-----------|-----------|-----------|-----------|-----------|-----------|-----------|-----------|
| S         | Pag/100g1 | Pag/100g2 | Pag/100g3 |
| 10:00     | 0.000     | 0.000     | 0.000     | 0.000     | 0.000     | 0.000     | 0.000     | 0.000     | 0.000     | 0.000     | 0.000     | 0.000     | 0.000     | 0.000     | 0.000     | 0.000     | 0.000     | 0.000     |
| 12:00     | 0.000     | 0.000     | 0.000     | 0.000     | 0.000     | 0.000     | 0.000     | 0.000     | 0.000     | 0.000     | 0.000     | 0.000     | 0.000     | 0.000     | 0.000     | 0.000     | 0.000     | 0.000     |
| 14:00     | 0.000     | 0.000     | 0.000     | 0.000     | 0.000     | 0.000     | 0.000     | 0.000     | 0.000     | 0.000     | 0.000     | 0.000     | 0.000     | 0.000     | 0.000     | 0.000     | 0.000     | 0.000     |
| 15:00     | 0.000     | 0.000     | 0.000     | 0.000     | 0.000     | 0.000     | 0.000     | 0.000     | 0.000     | 0.000     | 0.000     | 0.000     | 0.000     | 0.000     | 0.000     | 0.000     | 0.000     | 0.000     |
| 16:00     | 0.303     | 0.248     | 0.171     | 0.159     | 0.158     | 0.229     | 0.145     | 0.192     | 0.225     | 0.169     | 0.155     | 0.157     | 0.201     | 0.163     | 0.172     | 0.204     | 0.176     | 0.148     |
| 17:00     | 0.000     | 0.000     | 0.000     | 0.000     | 0.000     | 0.000     | 0.004     | 0.009     | 0.000     | 0.000     | 0.000     | 0.000     | 0.000     | 0.000     | 0.000     | 0.000     | 0.000     | 0.000     |
| 18:00     | 0.186     | 0.157     | 0.131     | 0.104     | 0.113     | 0.119     | 0.097     | 0.112     | 0.132     | 0.124     | 0.102     | 0.109     | 0.112     | 0.084     | 0.120     | 0.112     | 0.094     | 0.100     |
| 20:00     | 0.000     | 0.000     | 0.000     | 0.000     | 0.000     | 0.000     | 0.000     | 0.000     | 0.000     | 0.000     | 0.000     | 0.000     | 0.000     | 0.000     | 0.000     | 0.000     | 0.000     | 0.000     |
| 21:00     | 0.000     | 0.000     | 0.000     | 0.000     | 0.000     | 0.000     | 0.000     | 0.000     | 0.000     | 0.000     | 0.000     | 0.000     | 0.000     | 0.000     | 0.000     | 0.000     | 0.000     | 0.000     |
| 22:00     | 0.028     | 0.047     | 0.000     | 0.000     | 0.000     | 0.000     | 0.000     | 0.000     | 0.000     | 0.000     | 0.000     | 0.000     | 0.000     | 0.000     | 0.000     | 0.000     | 0.000     | 0.000     |
| 23:00     | 0.000     | 0.000     | 0.000     | 0.000     | 0.000     | 0.000     | 0.000     | 0.000     | 0.000     | 0.000     | 0.000     | 0.000     | 0.000     | 0.000     | 0.000     | 0.000     | 0.000     | 0.000     |
| 24        | 0.000     | 0.000     | 0.000     | 0.002     | 0.004     | 0.000     | 0.000     | 0.000     | 0.000     | 0.004     | 0.008     | 0.004     | 0.000     | 0.000     | 0.000     | 0.000     | 0.000     | 0.000     |
|           | 0.517     | 0.453     | 0.302     | 0.264     | 0.274     | 0.348     | 0.246     | 0.313     | 0.357     | 0.297     | 0.265     | 0.269     | 0.314     | 0.247     | 0.292     | 0.317     | 0.270     | 0.248     |
| M         |           |           |           |           |           |           |           |           |           |           |           |           |           |           |           |           |           |           |
| 14:01     | 0.000     | 0.000     | 0.000     | 0.000     | 0.000     | 0.000     | 0.000     | 0.000     | 0.000     | 0.000     | 0.000     | 0.000     | 0.000     | 0.000     | 0.000     | 0.000     | 0.000     | 0.000     |
| 15:01     | 0.000     | 0.000     | 0.000     | 0.000     | 0.000     | 0.000     | 0.000     | 0.000     | 0.000     | 0.000     | 0.000     | 0.000     | 0.000     | 0.000     | 0.000     | 0.000     | 0.000     | 0.000     |
| 16:01     | 0.000     | 0.000     | 0.000     | 0.005     | 0.006     | 0.016     | 0.000     | 0.009     | 0.011     | 0.000     | 0.000     | 0.000     | 0.008     | 0.009     | 0.000     | 0.012     | 0.013     | 0.000     |
| 17:01     | 0.000     | 0.000     | 0.000     | 0.000     | 0.000     | 0.000     | 0.000     | 0.000     | 0.000     | 0.000     | 0.000     | 0.000     | 0.000     | 0.000     | 0.000     | 0.000     | 0.000     | 0.000     |
| 18:1 9c   | 0.224     | 0.173     | 0.063     | 0.078     | 0.077     | 0.171     | 0.082     | 0.121     | 0.133     | 0.065     | 0.104     | 0.071     | 0.114     | 0.096     | 0.087     | 0.104     | 0.108     | 0.079     |
| 18:1 11c  | 0.040     | 0.031     | 0.026     | 0.020     | 0.020     | 0.031     | 0.016     | 0.022     | 0.025     | 0.019     | 0.022     | 0.020     | 0.024     | 0.021     | 0.022     | 0.023     | 0.021     | 0.018     |
| 20:01     | 0.000     | 0.000     | 0.000     | 0.000     | 0.000     | 0.000     | 0.000     | 0.000     | 0.000     | 0.000     | 0.000     | 0.000     | 0.000     | 0.000     | 0.000     | 0.000     | 0.000     | 0.000     |
| 22:01     | 0.000     | 0.000     | 0.000     | 0.000     | 0.000     | 0.000     | 0.000     | 0.000     | 0.000     | 0.000     | 0.000     | 0.000     | 0.000     | 0.000     | 0.000     | 0.000     | 0.000     | 0.000     |
| 24:00     | 0.020     | 0.029     | 0.004     | 0.003     | 0.004     | 0.000     | 0.000     | 0.000     | 0.000     | 0.004     | 0.009     | 0.006     | 0.000     | 0.005     | 0.014     | 0.004     | 0.005     | 0.000     |
|           | 0.284     | 0.234     | 0.092     | 0.106     | 0.107     | 0.218     | 0.098     | 0.152     | 0.169     | 0.088     | 0.135     | 0.097     | 0.145     | 0.131     | 0.123     | 0.143     | 0.147     | 0.097     |
| P         |           |           |           |           |           |           |           |           |           |           |           |           |           |           |           |           |           |           |
| 18:2 c    | 0.477     | 0.326     | 0.194     | 0.178     | 0.163     | 0.319     | 0.137     | 0.216     | 0.271     | 0.162     | 0.168     | 0.151     | 0.246     | 0.172     | 0.184     | 0.206     | 0.188     | 0.154     |
| 18:3 g    | 0.000     | 0.000     | 0.000     | 0.000     | 0.000     | 0.000     | 0.000     | 0.000     | 0.000     | 0.000     | 0.000     | 0.000     | 0.000     | 0.000     | 0.000     | 0.000     | 0.000     | 0.000     |
| 18:03 n-3 | 0.060     | 0.059     | 0.000     | 0.007     | 0.005     | 0.015     | 0.000     | 0.008     | 0.011     | 0.000     | 0.000     | 0.000     | 0.009     | 0.007     | 0.029     | 0.008     | 0.007     | 0.000     |
| 18:04     | 0.000     | 0.000     | 0.000     | 0.000     | 0.000     | 0.000     | 0.000     | 0.000     | 0.000     | 0.000     | 0.000     | 0.000     | 0.000     | 0.000     | 0.000     | 0.000     | 0.000     | 0.000     |
| 20:2 n-7  | 0.000     | 0.000     | 0.000     | 0.000     | 0.000     | 0.000     | 0.000     | 0.000     | 0.000     | 0.002     | 0.003     | 0.000     | 0.000     | 0.000     | 0.000     | 0.000     | 0.000     | 0.000     |
| 20:3 n-6  | 0.000     | 0.000     | 0.000     | 0.000     | 0.000     | 0.000     | 0.000     | 0.000     | 0.000     | 0.000     | 0.000     | 0.000     | 0.000     | 0.000     | 0.000     | 0.000     | 0.000     | 0.000     |
| 20:4 n-6  | 0.179     | 0.149     | 0.166     | 0.133     | 0.137     | 0.139     | 0.071     | 0.077     | 0.089     | 0.092     | 0.070     | 0.082     | 0.077     | 0.066     | 0.083     | 0.082     | 0.072     | 0.068     |
| 20:4 n-3  | 0.000     | 0.000     | 0.000     | 0.000     | 0.000     | 0.000     | 0.000     | 0.000     | 0.000     | 0.000     | 0.000     | 0.000     | 0.000     | 0.000     | 0.000     | 0.000     | 0.000     | 0.000     |
| 22:02     | 0.000     | 0.000     | 0.000     | 0.000     | 0.000     | 0.000     | 0.000     | 0.000     | 0.000     | 0.000     | 0.000     | 0.000     | 0.000     | 0.000     | 0.000     | 0.000     | 0.000     | 0.000     |
| 20:05 n-3 | 0.000     | 0.000     | 0.000     | 0.000     | 0.000     | 0.000     | 0.023     | 0.025     | 0.040     | 0.025     | 0.021     | 0.020     | 0.008     | 0.006     | 0.008     | 0.008     | 0.007     | 0.004     |
| 22:04     | 0.000     | 0.000     | 0.000     | 0.000     | 0.000     | 0.000     | 0.000     | 0.000     | 0.000     | 0.000     | 0.000     | 0.000     | 0.000     | 0.000     | 0.000     | 0.000     | 0.000     | 0.000     |
| 21:05 n-3 | 0.000     | 0.000     | 0.000     | 0.000     | 0.000     | 0.000     | 0.000     | 0.000     | 0.000     | 0.000     | 0.000     | 0.000     | 0.000     | 0.000     | 0.000     | 0.000     | 0.000     | 0.000     |
| 22:05 n-6 | 0.016     | 0.014     | 0.011     | 0.012     | 0.014     | 0.012     | 0.000     | 0.000     | 0.000     | 0.006     | 0.000     | 0.004     | 0.007     | 0.005     | 0.007     | 0.008     | 0.006     | 0.006     |
| 22:05 n-3 | 0.023     | 0.020     | 0.019     | 0.016     | 0.016     | 0.019     | 0.028     | 0.034     | 0.040     | 0.031     | 0.028     | 0.032     | 0.013     | 0.008     | 0.011     | 0.012     | 0.011     | 0.009     |
| 22:06 n-3 | 0.081     | 0.062     | 0.070     | 0.064     | 0.062     | 0.067     | 0.108     | 0.128     | 0.143     | 0.169     | 0.120     | 0.126     | 0.202     | 0.136     | 0.180     | 0.206     | 0.164     | 0.158     |
|           | 0.836     | 0.631     | 0.460     | 0.409     | 0.397     | 0.571     | 0.367     | 0.488     | 0.593     | 0.487     | 0.409     | 0.416     | 0.562     | 0.401     | 0.502     | 0.530     | 0.454     | 0.399     |
| w-3       | 0.164     | 0.141     | 0.090     | 0.087     | 0.083     | 0.101     | 0.159     | 0.196     | 0.234     | 0.225     | 0.169     | 0.179     | 0.232     | 0.157     | 0.228     | 0.234     | 0.188     | 0.171     |
| T         |           |           |           |           |           |           |           |           |           |           |           |           |           |           |           |           |           |           |
| 18:1 t    | 0.000     | 0.000     | 0.000     | 0.000     | 0.000     | 0.000     | 0.000     | 0.000     | 0.000     | 0.000     | 0.000     | 0.000     | 0.000     | 0.        |           |           |           |           |

**Supplemental Figure S3.** Results of the analysis of fatty acids composition in the gastrocnemius muscle used in the Supplemental Table 1 of this study. **MO-C:** Mineral oil supplemented group; **MO-HS:** Mineral oil supplemented and hindlimb suspension group; **EPA-C:** High eicosapentaenoic acid fish oil supplemented group; **EPA-HS:** High eicosapentaenoic acid fish oil supplemented and hindlimb suspension group; **DHA-C:** High docosahexaenoic acid fish oil supplemented group; **DHA-HS:** High docosahexaenoic acid fish oil supplemented and hindlimb suspension group.

## Supplemental Figure S4

| p-IRE1          |                 |                 |                 |            |                 | p-JNK1            |           |                 |           |                 |           |
|-----------------|-----------------|-----------------|-----------------|------------|-----------------|-------------------|-----------|-----------------|-----------|-----------------|-----------|
| MO-C            | MO-HS           | EPA-C           | EPA-HS          | DHA-C      | DHA-HS          | MO-C              | MO-HS     | EPA-C           | EPA-HS    | DHA-C           | DHA-HS    |
| 0.6153585       | 0.5497207       | 0.4044116       | 0.7700508       | 1.630951   | 1.999162        | 0.3871916         | 0.3975725 | 0.4863653       | 0.4059652 | 0.5834132       | 0.3501655 |
| 0.8997738       | 1.164103        | 1.014536        | <b>1.857821</b> | 2.355515   | 1.460809        | 0.4874083         | 0.2735124 | 0.8336885       | 0.6581348 | 0.6120651       | 1.243006  |
| 0.9194162       | <b>2.687632</b> | <b>3.556192</b> | 0.7280849       | 0.8740129  | <b>5.567465</b> | 1.624972          | 1.25753   | <b>2.101955</b> | 0.9493784 | 1.18002         | 1.450953  |
| 1.565451        | 1.006157        | 1.698187        | 0.9563621       | 1.482459   | 2.452181        | 1.500428          | 0.7043236 | 0.4065093       | 0.4190323 | 1.033029        | 0.6854423 |
| 0.2083717       | 0.4683085       | 0.390644        | 1.048939        | 0.7234957  | 0.6945592       | 0.3809046         | 0.8976814 | 0.8587769       | 0.3268104 | 0.2172374       | 0.2996055 |
| 0.9089412       | 0.5989404       | 0.7149263       | 0.4225054       | 1.034033   | 0.9780508       | 1.180888          | 1.595899  | 0.9892865       | 1.006252  | 1.553147        | 0.6189446 |
| 1.557801        | 0.7225244       | 1.363589        | 0.9749871       | 1.166191   | 0.8963407       | 1.645584          | 0.4753423 | 0.1841554       | 1.05153   | 0.5587942       | 1.506965  |
| 1.324886        | 0.7502297       | 1.619482        | 1.015114        | 1.070303   | 1.51302         | 0.7926243         | 1.194505  | 0.7764287       | 1.758858  | 0.6268156       | 1.316148  |
|                 |                 |                 |                 |            |                 |                   |           |                 |           |                 |           |
| Total JNK1      |                 |                 |                 |            |                 | p-JNK1/total JNK1 |           |                 |           |                 |           |
| MO-C            | MO-HS           | EPA-C           | EPA-HS          | DHA-C      | DHA-HS          | MO-C              | MO-HS     | EPA-C           | EPA-HS    | DHA-C           | DHA-HS    |
| 0.7023358       | 0.7807512       | 1.126911        | 1.489938        | 1.576421   | 1.182366        | 0.439367          | 0.4058354 | 0.3439688       | 0.2171535 | 0.2949514       | 0.2360302 |
| 1.706282        | 1.268036        | 1.684552        | 1.260394        | 1.379447   | 1.035032        | 0.2276609         | 0.1719062 | 0.394426        | 0.4161545 | 0.3536217       | 0.9571183 |
| 0.6138797       | 0.9206573       | 1.157587        | 0.9704418       | 1.127453   | 1.07681         | 2.109643          | 1.088596  | 1.447158        | 0.7796795 | 0.8341371       | 1.073892  |
| 0.9775026       | 1.011782        | 1.209735        | 0.9547787       | 1.279452   | 0.8558885       | 1.223329          | 0.5547938 | 0.2678099       | 0.3497768 | 0.6434799       | 0.6382633 |
| 1.357799        | 1.310717        | 1.44964         | 1.136579        | 1.228455   | 0.980612        | 0.2525267         | 0.6165098 | 0.5332699       | 0.258835  | 0.159185        | 0.2750295 |
| 0.9753177       | 0.9942121       | 1.022756        | 0.7702624       | 0.6786119  | 0.6312598       | 1.089907          | 1.444951  | 0.8707169       | 1.175966  | <b>2.060241</b> | 0.8826133 |
| 0.8130485       | 0.5443257       | 0.54624         | 1.479133        | 1.327633   | 1.106339        | 1.821924          | 0.786094  | 0.3034784       | 0.6399434 | 0.3788791       | 1.226145  |
| 0.8538344       | 0.8728133       | 1.030575        | 0.8667182       | 0.9188889  | 1.070962        | 0.8356426         | 1.231951  | 0.6781856       | 1.826753  | 0.6140499       | 1.10626   |
|                 |                 |                 |                 |            |                 |                   |           |                 |           |                 |           |
| p-p38           |                 |                 |                 |            |                 | Total p38         |           |                 |           |                 |           |
| MO-C            | MO-HS           | EPA-C           | EPA-HS          | DHA-C      | DHA-HS          | MO-C              | MO-HS     | EPA-C           | EPA-HS    | DHA-C           | DHA-HS    |
| 0.7290294       | 0.3726717       | 1.368305        | 0.09549447      | 0.1567636  | 0.4370244       | 0.9365178         | 0.6888247 | 0.7310548       | 0.7069595 | 1.184724        | 1.065191  |
| 0.8461534       | 0.551604        | 0.31547         | 0.5616307       | 1.199858   | 0.603361        | 0.3101498         | 0.1740624 | 0.7106556       | 0.5097835 | 0.7819099       | 0.569061  |
| <b>0</b>        | 0.2226684       | 0.05338126      | 0.1117527       | 0.1276871  | 0.7128024       | 0.6018504         | 0.6719724 | 0.7864144       | 0.3008575 | 0.3931499       | 1.115617  |
| 1.424817        | 0.3007653       | 0.6838436       | 1.012428        | 0.6256877  | 1.744648        | 2.151482          | 0.71633   | 1.266323        | 1.231333  | 1.116805        | 1.197905  |
| <b>0</b>        | 0.4798277       | 1.046334        | 0.6451332       | 0.1218611  | 1.359512        | 1.271954          | 0.6087031 | 1.358421        | 1.720866  | 1.389281        | 0.3969254 |
| 1.114661        | 0.6737167       | 0.4442618       | 0.6915135       | 1.611775   | 0.04808569      | 1.276328          | 0.5658719 | 0.6607621       | 0.5914445 | 1.477918        | 0.8968603 |
| 0.8575584       | 0.2499453       | 1.011951        | 0.8550895       | 1.113358   | 0.7644187       | 0.7052578         | 0.8355139 | 0.916728        | 0.3089169 | 1.040816        | 1.017373  |
| 1.027781        | 0.7969056       | 1.15758         | <b>2.215019</b> | 0.1058038  | 1.038571        | 0.7464595         | 0.4569152 | 1.44857         | 0.6780984 | 0.1911304       | 0.3776686 |
|                 |                 |                 |                 |            |                 |                   |           |                 |           |                 |           |
| p-p38/total p38 |                 |                 |                 |            |                 | BiP               |           |                 |           |                 |           |
| MO-C            | MO-HS           | EPA-C           | EPA-HS          | DHA-C      | DHA-HS          | MO-C              | MO-HS     | EPA-C           | EPA-HS    | DHA-C           | DHA-HS    |
| 0.5601808       | 0.3893292       | 1.34689         | 0.09720374      | 0.09521984 | 0.2952415       | <b>0</b>          | 0.2807142 | 1.065777        | 1.357345  | 0.8471891       | 0.2648359 |
| 1.963256        | 2.280456        | 0.3194465       | 0.7928013       | 1.104263   | 0.762988        | 0.8775132         | 0.2957402 | 0.2632837       | 0.2643753 | 0.4639175       | 0.1775585 |
| <b>0</b>        | 0.238455        | 0.04884686      | 0.2672984       | 0.2337159  | 0.4597833       | 1.153148          | 0.4495475 | 0.9144222       | 0.3425869 | 0.4699619       | 0.3920566 |
| 0.4765634       | 0.302144        | 0.3886077       | 0.5916811       | 0.4031619  | 1.064225        | 0.9693384         | 0.2669658 | 0.7816318       | 0.2923143 | 0.6335202       | 0.6537158 |
| <b>0</b>        | 0.6822644       | 0.666667        | 0.3244705       | 0.07591854 | 2.96447         | 0.9757515         | 0.9718959 | 1.811129        | 1.52732   | 1.313757        | 0.9616829 |
| 0.7558805       | 1.030462        | 0.5819246       | 1.012002        | 0.9439021  | 0.04640491      | 1.101882          | 0.3417288 | 0.8086839       | 0.4733619 | 0.583824        | 0.8605221 |
| 1.052419        | 0.2589191       | 0.9554148       | 2.395757        | 0.9258346  | 0.650315        | 1.147827          | 1.171393  | 0.9317048       | 0.8206658 | 1.086263        | 0.8239077 |
| 1.191701        | 1.509538        | 0.6916466       | 2.827207        | 0.47912    | 2.380115        | 0.7745399         | 0.487431  | 1.064199        | 0.3442866 | 0.7676737       | 0.2835129 |
|                 |                 |                 |                 |            |                 |                   |           |                 |           |                 |           |
| PDI             |                 |                 |                 |            |                 | CHOP              |           |                 |           |                 |           |
| MO-C            | MO-HS           | EPA-C           | EPA-HS          | DHA-C      | DHA-HS          | MO-C              | MO-HS     | EPA-C           | EPA-HS    | DHA-C           | DHA-HS    |
| 0.5315657       | 0.2042233       | 0.50086         | 0.5072151       | 0.573514   | 0.3573191       | 0.4054731         | 0.796629  | 1.319978        | 1.741857  | 1.872081        | 4.209004  |
| 1.23878         | 1.05621         | 0.7158358       | 0.965629        | 0.6405954  | 0.4574019       | 2.03895           | 2.229763  | 1.574215        | 2.273082  | 2.152474        | 0.2562622 |
| 1.778726        | 1.496685        | 1.02199         | 0.3641724       | 0.596355   | 0.505756        | 1.321636          | 2.180821  | 2.257548        | 2.222811  | 2.935706        | 2.720378  |
| 0.4509286       | 0.414589        | 0.5634969       | 0.3337305       | 0.4737948  | 0.4734475       | 0.2339406         | 0.3375282 | 0.9856287       | 1.187397  | 2.77637         | 2.846222  |
| 1.070917        | 0.8171548       | 0.9285584       | 0.9124311       | 1.114486   | 1.289647        | 0.8396529         | 0.7395914 | 0.709124        | 0.6809554 | 0.4247961       | 0.5880466 |
| 1.11959         | 0.9437391       | 1.259529        | 1.034163        | 1.514888   | 2.060867        | 1.282733          | 1.169081  | 2.049561        | 1.155932  | 1.026089        | 0.891471  |
| 0.9281873       | 1.726753        | 1.950918        | 1.54825         | 2.292979   | 3.048619        | 0.7202581         | 0.7898347 | 0.7333388       | 0.5047874 | 0.5038145       | 0.1126229 |
| 0.8813055       | 0.8296435       | 0.9381829       | 0.8741558       | 1.10552    | 1.100499        | 1.157356          | 0.4675514 | 0.4577951       | 0.2489748 | 0.268135        | 0.3043923 |
|                 |                 |                 |                 |            |                 |                   |           |                 |           |                 |           |
| Caspase 3       |                 |                 |                 |            |                 |                   |           |                 |           |                 |           |
| MO-C            | MO-HS           | EPA-C           | EPA-HS          | DHA-C      | DHA-HS          |                   |           |                 |           |                 |           |
| 0.8130626       | 1.110164        | 1.02688         | 1.76136         | 0.9353209  | 0.9968339       |                   |           |                 |           |                 |           |
| 1.342096        | 1.580731        | 1.133577        | 1.584083        | 0.6919156  | 0.8467507       |                   |           |                 |           |                 |           |
| 0.8448417       | 1.613304        | 1.359702        | 2.266006        | 2.427004   | 1.853052        |                   |           |                 |           |                 |           |
| <b>0</b>        | <b>3.092324</b> | 1.182628        | 1.019917        | 1.080899   | 2.841983        |                   |           |                 |           |                 |           |
| 0.9440381       | 1.35222         | 1.284026        | 1.480267        | 0.9387398  | 0.8509735       |                   |           |                 |           |                 |           |
| 0.8446205       | 1.180406        | 0.909142        | 1.072325        | 1.151763   | 1.748046        |                   |           |                 |           |                 |           |
| 1.010927        | 1.577311        | 1.56993         | 2.006764        | 1.814891   | 2.278161        |                   |           |                 |           |                 |           |
| 1.200414        | 1.408836        | 1.216581        | 1.194373        | 1.151727   | 1.620704        |                   |           |                 |           |                 |           |

**Supplemental Figure S4.** Results of the quantitative analysis of western blot assays used in the Figures 1-4 of this study. **MO-C:** Mineral oil supplemented group; **MO-HS:** Mineral oil supplemented and hindlimb suspension group; **EPA-C:** High eicosapentaenoic acid fish oil supplemented group; **EPA-HS:** High eicosapentaenoic acid fish oil supplemented and hindlimb suspension group; **DHA-C:** High docosahexaenoic acid fish oil supplemented group; **DHA-HS:** High docosahexaenoic acid fish oil supplemented and hindlimb suspension group. Grubb's test was used to exclude outliers (blue numbers).



## Supplemental Figure S5

| BiP       |           |           |           |           |           | CHOP      |           |            |           |           |            |
|-----------|-----------|-----------|-----------|-----------|-----------|-----------|-----------|------------|-----------|-----------|------------|
| MO-C      | MO-HS     | EPA-C     | EPA-HS    | DHA-C     | DHA-HS    | MO-C      | MO-HS     | EPA-C      | EPA-HS    | DHA-C     | DHA-HS     |
| 0.6757534 | 0.5694513 | 0.9928343 | 0.2054358 | 0.4982093 | 0.3826492 | 0.902231  | 1.128686  | 0.8625171  | 0.1564485 | 1.095678  | 1.03605    |
| 0.4247056 | 0.5221807 | 0.6894848 | 0.2418308 | 0.7078679 | 0.708095  | 0.6248297 | 1.337576  | 1.206302   | 0.8461994 | 0.5817826 | 2.127287   |
| 1.089224  | 0.2590941 | 1.911067  | 0.319735  | 1.074549  | 0.2052097 | 0.7957022 | 0.978435  | 1.258215   | 0.5111961 | 1.338606  | 0.2977495  |
| 0.5166567 | 0.4915888 | 0.5461434 | 0.2666981 | 0.5829486 | 0.3818604 | 0.8090371 | 1.267973  | 0.03885789 | 0.392368  | 1.282039  | 0.8815518  |
| 0.9318824 | 0.3833502 | 1.235712  | 0.3624342 | 0.3421474 | 0.2354435 | 0.8095656 | 0.6171679 | 0.9153166  | 0.9745384 | 0.5624084 | 1.454429   |
| 1.401891  | 0.390218  | 0.6872534 | 0.2030624 | 1.681313  | 0.1557699 | 1.314373  | 1.101411  | 0.7932865  | 0.5498063 | 1.785822  | 0.4276458  |
| 0.9047857 | 0.4948895 | 2.013075  | 0.5426381 | 0.7209339 | 0.2864181 | 0.9218782 | 0.3396636 | 2.065371   | 1.010495  | 0.630662  | 0.4840388  |
| 0.9242067 |           | 0.6383536 |           | 0.4627544 | 0.2282302 | 1.023341  |           | 0.9456825  |           | 0.8921255 | 0.7348703  |
| 2.227358  |           | 0.6398183 |           | 0.9528923 | 0.8931368 | 1.497269  |           | 0.8542523  |           | 0.6273685 | 1.733819   |
| 2.544628  |           | 0.4627929 |           | 0.8575469 |           | 1.833315  |           | 1.759833   |           | 0.9561359 |            |
| IRE1      |           |           |           |           |           | PERK      |           |            |           |           |            |
| MO-C      | MO-HS     | EPA-C     | EPA-HS    | DHA-C     | DHA-HS    | MO-C      | MO-HS     | EPA-C      | EPA-HS    | DHA-C     | DHA-HS     |
| 0.4732153 | 2.738991  | 0.5454901 | 0.3985299 | 0.4063582 | 0.7120716 | 0.5047247 | 1.598417  | 0.6322753  | 0.7452311 | 0.504814  | 0.9815231  |
| 1.087138  | 1.691873  | 0.6875758 | 0.7621092 | 0.8690747 | 1.969753  | 1.059611  | 1.755183  | 0.8781813  | 0.6741164 | 0.7323231 | 0.9733393  |
| 0.4115959 | 0.8997199 | 1.042739  | 1.214994  | 0.716844  | 0.4668953 | 0.4770791 | 0.7425437 | 1.200286   | 0.9753208 | 0.8601922 | 0.5881153  |
| 0.7543353 | 3.297846  | 0.3128085 | 1.034748  | 0.7670756 | 1.502242  | 0.7052848 | 2.557127  | 0.7201411  | 0.7281357 | 0.7171966 | 0.6830757  |
| 1.105133  | 1.285861  | 0.5290012 | 1.339589  | 1.838705  | 1.47371   | 0.937714  | 0.9564323 | 0.4551275  | 0.8980023 | 0.4971283 | 0.8903552  |
| 0.8665618 | 1.147387  | 0.9558883 | 1.046807  | 4.157131  | 0.5409204 | 0.8387859 | 1.302562  | 0.5277454  | 0.7894914 | 3.996087  | 0.4312177  |
| 0.5554188 | 0.8017245 | 1.003751  | 4.904351  | 0.8490603 | 1.158449  | 0.5229149 | 0.855108  | 0.7363181  | 5.087871  | 1.033071  | 0.760592   |
| 1.182867  |           | 0.9648842 |           | 0.6946309 | 0.576168  | 1.046293  |           | 0.8653933  |           | 0.5348916 | 0.7513523  |
| 2.397172  |           | 0.8188858 |           | 0.6908216 | 5.216033  | 2.048167  |           | 1.060492   |           | 0.476116  | 5.641008   |
| 4.150988  |           | 9.00999   |           | 0.3800569 |           | 6.304817  |           | 6.715239   |           | 0.6817372 |            |
| BECLIN    |           |           |           |           |           | LC3II     |           |            |           |           |            |
| MO-C      | MO-HS     | EPA-C     | EPA-HS    | DHA-C     | DHA-HS    | MO-C      | MO-HS     | EPA-C      | EPA-HS    | DHA-C     | DHA-HS     |
| 0.8739173 | 0.8880078 | 0.2775126 | 0.6496614 | 0.7050629 | 0.4219354 | 1.116179  | 0.7964437 | 0.8788111  | 0.5628256 | 0.6919904 | 1.336161   |
| 0.6486602 | 0.4455382 | 0.803623  | 0.3063111 | 0.9218169 | 0.4941479 | 1.4325    | 1.666269  | 1.187223   | 2.213101  | 1.608317  | 1.439946   |
| 0.4073386 | 0.5405679 | 0.3699439 | 0.2545373 | 0.7293742 | 0.2617336 | 0.6229984 | 1.261857  | 1.88999    | 1.877677  | 1.53446   | 1.221938   |
| 0.6454055 | 1.861575  | 0.4532414 | 0.3595537 | 0.4451738 | 0.7695662 | 1.165766  | 0.7843252 | 0.3466019  | 1.130749  | 1.315344  | 1.664533   |
| 0.9788908 | 0.1904831 | 0.4987341 | 0.3968844 | 0.4978179 | 0.770813  | 1.126791  | 1.803419  | 1.056537   | 2.203491  | 1.76136   | 3.452049   |
| 0.8457919 | 0.3306444 | 0.312064  | 0.32556   | 3.946539  | 0.4001155 | 1.080257  | 2.542684  | 1.583277   | 2.134644  | 0.8727183 | 2.481975   |
| 1.146033  | 0.2216228 | 0.9204435 | 2.280045  | 0.426004  | 0.1669161 | 1.188917  | 0.8231221 | 1.477749   | 0.4389298 | 0.8133448 | 3.227003   |
| 1.178774  |           | 0.5717387 |           | 0.4350697 | 0.2660117 | 1.495147  |           | 1.511968   |           | 1.368237  | 1.051582   |
| 2.022772  |           | 0.8160527 |           | 0.9469664 | 1.714696  | 0.8641379 |           | 1.78972    |           | 1.234892  | 0.08082543 |
| 2.965868  |           | 3.835564  |           | 0.9587905 |           | 0.4605579 |           | 1.001692   |           | 0.9345136 |            |
| ATG14     |           |           |           |           |           |           |           |            |           |           |            |
| MO-C      | MO-HS     | EPA-C     | EPA-HS    | DHA-C     | DHA-HS    |           |           |            |           |           |            |
| 0.4709248 | 2.292059  | 0.6871157 | 1.700265  | 0.4394661 | 0.9747432 |           |           |            |           |           |            |
| 1.143562  | 2.623733  | 0.7698187 | 0.8956889 | 0.6785618 | 1.475307  |           |           |            |           |           |            |
| 0.467261  | 1.569764  | 0.922345  | 0.675463  | 0.9092388 | 0.5374382 |           |           |            |           |           |            |
| 0.8271827 | 2.402479  | 0.9502319 | 0.6746818 | 0.9268711 | 2.602895  |           |           |            |           |           |            |
| 1.122893  | 2.035996  | 0.4519837 | 1.296652  | 1.095576  | 2.717826  |           |           |            |           |           |            |
| 0.6445547 | 2.315546  | 0.7259358 | 1.393773  | 2.426014  | 1.501587  |           |           |            |           |           |            |
| 0.6305348 | 2.076535  | 0.4170814 | 2.40671   | 0.9246241 | 1.735312  |           |           |            |           |           |            |
| 1.113644  |           | 0.8475837 |           | 0.8451729 | 0.5538478 |           |           |            |           |           |            |
| 1.897807  |           | 1.038668  |           | 0.5622895 | 3.520921  |           |           |            |           |           |            |
| 4.981066  |           | 5.0892    |           | 0.5853159 |           |           |           |            |           |           |            |

**Supplemental Figure S5.** RT-PCR results after  $2^{-\Delta\Delta CT}$  calculation for the relative expression of genes used in the Figures 5 and 6 of this study. **MO-C:** Mineral oil supplemented group; **MO-HS:** Mineral oil supplemented and hindlimb suspension group; **EPA-C:** High eicosapentaenoic acid fish oil supplemented group; **EPA-HS:** High eicosapentaenoic acid fish oil supplemented and hindlimb suspension group; **DHA-C:** High docosahexaenoic acid fish oil supplemented group; **DHA-HS:** High docosahexaenoic acid fish oil supplemented and hindlimb suspension group. Grubb's test was used to exclude outliers (blue numbers).
